# Supplementary material
Source: Springer Nature journal article supplement (https://www.springermedizin.de/resource/supplementary/12874_2012_984_MOESM2_ESM.pdf/9432982)
Supplement: MOESM2 [file 9432982]

**Table S1 Associational risk ratios in terms of response types**

Pooled associational risk ratios among those who do not drop out in observational studies (see Figures 2A and 3)

$$aRR_{S=1} = \frac{\left( \frac{\sum_{\substack{i=1,2 \\ j=1,2,3,4,5,6,7,8 \\ k=1,2,3,4,5,6,7,8}} P_{C|EiDjSk} P_{EiDjSk} + \sum_{\substack{i=1,3 \\ j=1,2,3,4,9,10,11,12 \\ k=1,2,3,4,5,6,7,8}} P_{\bar{C}|EiDjSk} P_{EiDjSk}}{\sum_{\substack{i=1,2 \\ j=1,2,3,4,5,6,7,8 \\ k=1,2,3,4,5,6,7,8}} P_{C|EiDjSk} P_{EiDjSk} + \sum_{\substack{i=1,2 \\ j=9,10,11,12,13,14,15,16 \\ k=1,2,5,6,9,10,13,14}} P_{C|EiDjSk} P_{EiDjSk} + \sum_{\substack{i=1,3 \\ j=1,2,3,4,9,10,11,12 \\ k=1,2,3,4,5,6,7,8}} P_{\bar{C}|EiDjSk} P_{EiDjSk} + \sum_{\substack{i=1,3 \\ j=5,6,7,8,13,14,15,16 \\ k=1,2,5,6,9,10,13,14}} P_{\bar{C}|EiDjSk} P_{EiDjSk}} \right)}{\left( \frac{\sum_{\substack{i=3,4 \\ j=1,2,5,6,9,10,13,14 \\ k=1,2,3,4,9,10,11,12}} P_{C|EiDjSk} P_{EiDjSk} + \sum_{\substack{i=2,4 \\ j=1,3,5,7,9,11,13,15 \\ k=1,2,3,4,9,10,11,12}} P_{\bar{C}|EiDjSk} P_{EiDjSk}}{\sum_{\substack{i=3,4 \\ j=1,2,5,6,9,10,13,14 \\ k=1,2,3,4,9,10,11,12}} P_{C|EiDjSk} P_{EiDjSk} + \sum_{\substack{i=3,4 \\ j=3,4,7,8,11,12,15,16 \\ k=1,3,5,7,9,11,13,15}} P_{C|EiDjSk} P_{EiDjSk} + \sum_{\substack{i=2,4 \\ j=1,3,5,7,9,11,13,15 \\ k=1,2,3,4,9,10,11,12}} P_{\bar{C}|EiDjSk} P_{EiDjSk} + \sum_{\substack{i=2,4 \\ j=2,4,6,8,10,12,14,16 \\ k=1,3,5,7,9,11,13,15}} P_{\bar{C}|EiDjSk} P_{EiDjSk}} \right)} \quad (A1)$$

Stratum-specific associational risk ratios among those who do not drop out in observational studies (see Figures 2A and 3)

$$aRR_{C=1,S=1} = \frac{\sum_{\substack{i=1,2 \\ j=1,2,3,4,5,6,7,8 \\ k=1,2,3,4,5,6,7,8}} P_{C|EiDjSk} P_{EiDjSk}}{\sum_{\substack{i=1,2 \\ j=1,2,3,4,5,6,7,8 \\ k=1,2,3,4,5,6,7,8}} P_{C|EiDjSk} P_{EiDjSk} + \sum_{\substack{i=1,2 \\ j=9,10,11,12,13,14,15,16 \\ k=1,2,5,6,9,10,13,14}} P_{C|EiDjSk} P_{EiDjSk}} \Bigg/ \frac{\sum_{\substack{i=3,4 \\ j=1,2,5,6,9,10,13,14 \\ k=1,2,3,4,9,10,11,12}} P_{C|EiDjSk} P_{EiDjSk}}{\sum_{\substack{i=3,4 \\ j=1,2,5,6,9,10,13,14 \\ k=1,2,3,4,9,10,11,12}} P_{C|EiDjSk} P_{EiDjSk} + \sum_{\substack{i=3,4 \\ j=3,4,7,8,11,12,15,16 \\ k=1,3,5,7,9,11,13,15}} P_{C|EiDjSk} P_{EiDjSk}} \quad (A2)$$

$$aRR_{C=0,S=1} = \frac{\sum_{\substack{i=1,3 \\ j=1,2,3,4,9,10,11,12 \\ k=1,2,3,4,5,6,7,8}} P_{\bar{C}|EiDjSk} P_{EiDjSk}}{\sum_{\substack{i=1,3 \\ j=1,2,3,4,9,10,11,12 \\ k=1,2,3,4,5,6,7,8}} P_{\bar{C}|EiDjSk} P_{EiDjSk} + \sum_{\substack{i=1,3 \\ j=5,6,7,8,13,14,15,16 \\ k=1,2,5,6,9,10,13,14}} P_{\bar{C}|EiDjSk} P_{EiDjSk}} \Bigg/ \frac{\sum_{\substack{i=2,4 \\ j=1,3,5,7,9,11,13,15 \\ k=1,2,3,4,9,10,11,12}} P_{\bar{C}|EiDjSk} P_{EiDjSk}}{\sum_{\substack{i=2,4 \\ j=1,3,5,7,9,11,13,15 \\ k=1,2,3,4,9,10,11,12}} P_{\bar{C}|EiDjSk} P_{EiDjSk} + \sum_{\substack{i=2,4 \\ j=2,4,6,8,10,12,14,16 \\ k=1,3,5,7,9,11,13,15}} P_{\bar{C}|EiDjSk} P_{EiDjSk}} \quad (A3)$$

Pooled associational risk ratios in the total population in observational studies (see Figures 2B and 3)

$$aRR = \frac{\left( \frac{\sum_{\substack{i=1,2 \\ j=1,2,3,4,5,6,7,8 \\ k=1,2,3,4,5,6,7,8,9,10,11,12,13,14,15,16}} P_{C|EiDjSk} P_{EiDjSk} + \sum_{\substack{i=1,3 \\ j=1,2,3,4,9,10,11,12 \\ k=1,2,3,4,5,6,7,8,9,10,11,12,13,14,15,16}} P_{\bar{C}|EiDjSk} P_{EiDjSk}}{\sum_{\substack{i=1,2 \\ j=1,2,3,4,5,6,7,8,9,10,11,12,13,14,15,16 \\ k=1,2,3,4,5,6,7,8,9,10,11,12,13,14,15,16}} P_{C|EiDjSk} P_{EiDjSk} + \sum_{\substack{i=1,3 \\ j=1,2,3,4,5,6,7,8,9,10,11,12,13,14,15,16 \\ k=1,2,3,4,5,6,7,8,9,10,11,12,13,14,15,16}} P_{\bar{C}|EiDjSk} P_{EiDjSk}} \right)}{\left( \frac{\sum_{\substack{i=3,4 \\ j=1,2,5,6,9,10,13,14 \\ k=1,2,3,4,5,6,7,8,9,10,11,12,13,14,15,16}} P_{C|EiDjSk} P_{EiDjSk} + \sum_{\substack{i=2,4 \\ j=1,3,5,9,11,13,15 \\ k=1,2,3,4,5,6,7,8,9,10,11,12,13,14,15,16}} P_{\bar{C}|EiDjSk} P_{EiDjSk}}{\sum_{\substack{i=3,4 \\ j=1,2,3,4,5,6,7,8,9,10,11,12,13,14,15,16 \\ k=1,2,3,4,5,6,7,8,9,10,11,12,13,14,15,16}} P_{C|EiDjSk} P_{EiDjSk} + \sum_{\substack{i=2,4 \\ j=1,2,3,4,5,6,7,8,9,10,11,12,13,14,15,16 \\ k=1,2,3,4,5,6,7,8,9,10,11,12,13,14,15,16}} P_{\bar{C}|EiDjSk} P_{EiDjSk}} \right)} = \frac{\sum_{\substack{i=1,2 \\ j=1,2,3,4,5,6,7,8}} P_{C|EiDj} P_{EiDj} + \sum_{\substack{i=1,3 \\ j=1,2,3,4,9,10,11,12}} P_{\bar{C}|EiDj} P_{EiDj}}{\sum_{\substack{i=1,2 \\ j=1,2,3,4,5,6,7,8}} P_{C|Ei} P_{Ei} + \sum_{\substack{i=1,3 \\ j=1,2,3,4,9,10,11,12}} P_{\bar{C}|Ei} P_{Ei}} \Bigg/ \frac{\sum_{\substack{i=3,4 \\ j=1,2,5,6,9,10,13,14}} P_{C|EiDj} P_{EiDj} + \sum_{\substack{i=2,4 \\ j=1,3,5,9,11,13,15}} P_{\bar{C}|EiDj} P_{EiDj}}{\sum_{\substack{i=3,4 \\ j=1,2,5,6,9,10,13,14}} P_{C|Ei} P_{Ei} + \sum_{\substack{i=2,4 \\ j=1,3,5,9,11,13,15}} P_{\bar{C}|Ei} P_{Ei}} \quad (A4)$$

Stratum-specific associational risk ratios in the total population in observational studies (see Figures 2B and 3)

$$aRR_{C=1} = \frac{\sum_{\substack{i=1,2 \\ j=1,2,3,4,5,6,7,8 \\ k=1,2,3,4,5,6,7,8,9,10,11,12,13,14,15,16}} P_{C|EiDjSk} P_{EiDjSk}}{\sum_{\substack{i=1,2 \\ j=1,2,3,4,5,6,7,8,9,10,11,12,13,14,15,16 \\ k=1,2,3,4,5,6,7,8,9,10,11,12,13,14,15,16}} P_{C|EiDjSk} P_{EiDjSk}} \Bigg/ \frac{\sum_{\substack{i=3,4 \\ j=1,2,5,6,9,10,13,14 \\ k=1,2,3,4,5,6,7,8,9,10,11,12,13,14,15,16}} P_{C|EiDjSk} P_{EiDjSk}}{\sum_{\substack{i=3,4 \\ j=1,2,5,6,9,10,13,14 \\ k=1,2,3,4,5,6,7,8,9,10,11,12,13,14,15,16}} P_{C|EiDjSk} P_{EiDjSk}} = \frac{\left( \frac{\sum_{\substack{i=1,2 \\ j=1,2,3,4,5,6,7,8}} P_{C|EiDj} P_{EiDj}}{\sum_{\substack{i=1,2 \\ j=1,2,3,4,5,6,7,8}} P_{C|Ei} P_{Ei}} \right)}{\left( \frac{\sum_{\substack{i=3,4 \\ j=1,2,5,6,9,10,13,14}} P_{C|EiDj} P_{EiDj}}{\sum_{\substack{i=3,4 \\ j=1,2,5,6,9,10,13,14}} P_{C|Ei} P_{Ei}} \right)} \quad (A5)$$

$$aRR_{C=0} = \frac{\sum_{\substack{i=1,3 \\ j=1,2,3,4,9,10,11,12 \\ k=1,2,3,4,5,6,7,8,9,10,11,12,13,14,15,16}} P_{\bar{C}|EiDjSk} P_{EiDjSk}}{\sum_{\substack{i=1,3 \\ j=1,2,3,4,9,10,11,12,13,14,15,16 \\ k=1,2,3,4,5,6,7,8,9,10,11,12,13,14,15,16}} P_{\bar{C}|EiDjSk} P_{EiDjSk}} \Bigg/ \frac{\sum_{\substack{i=2,4 \\ j=1,3,5,9,11,13,15 \\ k=1,2,3,4,5,6,7,8,9,10,11,12,13,14,15,16}} P_{\bar{C}|EiDjSk} P_{EiDjSk}}{\sum_{\substack{i=2,4 \\ j=1,3,5,9,11,13,15 \\ k=1,2,3,4,5,6,7,8,9,10,11,12,13,14,15,16}} P_{\bar{C}|EiDjSk} P_{EiDjSk}} = \frac{\left( \frac{\sum_{\substack{i=1,3 \\ j=1,2,3,4,9,10,11,12}} P_{\bar{C}|EiDj} P_{EiDj}}{\sum_{\substack{i=1,3 \\ j=1,2,3,4,9,10,11,12}} P_{\bar{C}|Ei} P_{Ei}} \right)}{\left( \frac{\sum_{\substack{i=2,4 \\ j=1,3,5,9,11,13,15}} P_{\bar{C}|EiDj} P_{EiDj}}{\sum_{\substack{i=2,4 \\ j=1,3,5,9,11,13,15}} P_{\bar{C}|Ei} P_{Ei}} \right)} \quad (A6)$$

Abbreviation: aRR, associational risk ratio.

For the definitions of notations, see Figure 3.

**Table S2 Causal risk ratios in terms of response types**

Pooled causal risk ratios among those who do not drop out in randomized controlled trials (see Figures 2C and 4)

$$\text{cRR}_{S=1} = \frac{\left( \frac{\sum_{j=1,2,3,4,5,6,7,8} P_{C|DjSk} P_{DjSk} + \sum_{k=1,2,3,4,5,6,7,8} P_{\bar{C}|DjSk} P_{DjSk}}{\sum_{j=1,2,3,4,5,6,7,8} P_{C|DjSk} P_{DjSk} + \sum_{k=1,2,3,4,5,6,7,8} P_{\bar{C}|DjSk} P_{DjSk}} + \frac{\sum_{j=9,10,11,12,13,14,15,16} P_{C|DjSk} P_{DjSk} + \sum_{k=1,2,5,6,9,10,13,14} P_{\bar{C}|DjSk} P_{DjSk}}{\sum_{j=9,10,11,12,13,14,15,16} P_{C|DjSk} P_{DjSk} + \sum_{k=1,2,5,6,9,10,13,14} P_{\bar{C}|DjSk} P_{DjSk}} + \frac{\sum_{j=1,2,3,4,9,10,11,12} P_{C|DjSk} P_{DjSk} + \sum_{k=1,2,3,4,5,6,7,8} P_{\bar{C}|DjSk} P_{DjSk}}{\sum_{j=1,2,3,4,9,10,11,12} P_{C|DjSk} P_{DjSk} + \sum_{k=1,2,3,4,5,6,7,8} P_{\bar{C}|DjSk} P_{DjSk}} + \frac{\sum_{j=5,6,7,8,13,14,15,16} P_{C|DjSk} P_{DjSk} + \sum_{k=1,2,5,6,9,10,13,14} P_{\bar{C}|DjSk} P_{DjSk}}{\sum_{j=5,6,7,8,13,14,15,16} P_{C|DjSk} P_{DjSk} + \sum_{k=1,2,5,6,9,10,13,14} P_{\bar{C}|DjSk} P_{DjSk}} \right)}{\left( \frac{\sum_{j=1,2,5,6,9,10,13,14} P_{C|DjSk} P_{DjSk} + \sum_{k=1,2,3,4,9,10,11,12} P_{\bar{C}|DjSk} P_{DjSk}}{\sum_{j=1,2,5,6,9,10,13,14} P_{C|DjSk} P_{DjSk} + \sum_{k=1,2,3,4,9,10,11,12} P_{\bar{C}|DjSk} P_{DjSk}} + \frac{\sum_{j=3,4,7,8,11,12,15,16} P_{C|DjSk} P_{DjSk} + \sum_{k=1,3,5,7,9,11,13,15} P_{\bar{C}|DjSk} P_{DjSk}}{\sum_{j=3,4,7,8,11,12,15,16} P_{C|DjSk} P_{DjSk} + \sum_{k=1,3,5,7,9,11,13,15} P_{\bar{C}|DjSk} P_{DjSk}} + \frac{\sum_{j=1,3,5,7,9,11,13,15} P_{C|DjSk} P_{DjSk} + \sum_{k=1,2,3,4,9,10,11,12} P_{\bar{C}|DjSk} P_{DjSk}}{\sum_{j=1,3,5,7,9,11,13,15} P_{C|DjSk} P_{DjSk} + \sum_{k=1,2,3,4,9,10,11,12} P_{\bar{C}|DjSk} P_{DjSk}} + \frac{\sum_{j=2,4,6,8,10,12,14,16} P_{C|DjSk} P_{DjSk} + \sum_{k=1,3,5,7,9,11,13,15} P_{\bar{C}|DjSk} P_{DjSk}}{\sum_{j=2,4,6,8,10,12,14,16} P_{C|DjSk} P_{DjSk} + \sum_{k=1,3,5,7,9,11,13,15} P_{\bar{C}|DjSk} P_{DjSk}} \right)} \quad (\text{A7})$$

Stratum-specific causal risk ratios among those who do not drop out in randomized controlled trials (see Figures 2C and 4)

$$\text{cRR}_{C=1,S=1} = \frac{\frac{\sum_{j=1,2,3,4,5,6,7,8} P_{C|DjSk} P_{DjSk}}{\sum_{j=1,2,3,4,5,6,7,8} P_{C|DjSk} P_{DjSk} + \sum_{k=1,2,3,4,5,6,7,8} P_{\bar{C}|DjSk} P_{DjSk}}}{\frac{\sum_{j=1,2,5,6,9,10,13,14} P_{C|DjSk} P_{DjSk}}{\sum_{j=1,2,5,6,9,10,13,14} P_{C|DjSk} P_{DjSk} + \sum_{k=1,2,3,4,9,10,11,12} P_{\bar{C}|DjSk} P_{DjSk}} + \frac{\sum_{j=3,4,7,8,11,12,15,16} P_{C|DjSk} P_{DjSk}}{\sum_{j=3,4,7,8,11,12,15,16} P_{C|DjSk} P_{DjSk} + \sum_{k=1,3,5,7,9,11,13,15} P_{\bar{C}|DjSk} P_{DjSk}}} \quad (\text{A8})$$

$$\text{cRR}_{C=0,S=1} = \frac{\frac{\sum_{j=1,2,3,4,9,10,11,12} P_{\bar{C}|DjSk} P_{DjSk}}{\sum_{j=1,2,3,4,9,10,11,12} P_{\bar{C}|DjSk} P_{DjSk} + \sum_{k=1,2,3,4,5,6,7,8} P_{C|DjSk} P_{DjSk}}}{\frac{\sum_{j=1,3,5,7,9,11,13,15} P_{\bar{C}|DjSk} P_{DjSk}}{\sum_{j=1,3,5,7,9,11,13,15} P_{\bar{C}|DjSk} P_{DjSk} + \sum_{k=1,2,3,4,9,10,11,12} P_{C|DjSk} P_{DjSk}} + \frac{\sum_{j=2,4,6,8,10,12,14,16} P_{\bar{C}|DjSk} P_{DjSk}}{\sum_{j=2,4,6,8,10,12,14,16} P_{\bar{C}|DjSk} P_{DjSk} + \sum_{k=1,3,5,7,9,11,13,15} P_{C|DjSk} P_{DjSk}}} \quad (\text{A9})$$

Pooled causal risk ratios in the total population in ideal randomized controlled trials (see Figures 2D and 4)

$$\text{cRR} = \frac{\left( \frac{\sum_{j=1,2,3,4,5,6,7,8} P_{C|DjSk} P_{DjSk} + \sum_{k=1,2,3,4,5,6,7,8,9,10,11,12,13,14,15,16} P_{\bar{C}|DjSk} P_{DjSk}}{\sum_{j=1,2,3,4,5,6,7,8,9,10,11,12,13,14,15,16} P_{DjSk}} \right)}{\left( \frac{\sum_{j=1,2,5,6,9,10,13,14} P_{C|DjSk} P_{DjSk} + \sum_{k=1,2,3,4,5,6,7,8,9,10,11,12,13,14,15,16} P_{\bar{C}|DjSk} P_{DjSk}}{\sum_{j=1,2,5,6,9,10,13,14} P_{DjSk}} \right)} = \frac{\sum_{j=1,2,3,4,5,6,7,8} P_{C|Dj} P_{Dj} + \sum_{j=1,2,3,4,9,10,11,12} P_{\bar{C}|Dj} P_{Dj}}{\sum_{j=1,2,5,6,9,10,13,14} P_{C|Dj} P_{Dj} + \sum_{j=1,3,5,9,11,13,15} P_{\bar{C}|Dj} P_{Dj}} \quad (\text{A10})$$

Stratum-specific causal risk ratios in the total population in ideal randomized controlled trials (see Figures 2D and 4)

$$\text{cRR}_{C=1} = \frac{\frac{\sum_{j=1,2,3,4,5,6,7,8} P_{C|DjSk} P_{DjSk}}{\sum_{j=1,2,3,4,5,6,7,8,9,10,11,12,13,14,15,16} P_{C|DjSk} P_{DjSk}}}{\frac{\sum_{j=1,2,5,6,9,10,13,14} P_{C|DjSk} P_{DjSk}}{\sum_{j=1,2,3,4,5,6,7,8,9,10,11,12,13,14,15,16} P_{C|DjSk} P_{DjSk}} + \frac{\sum_{j=1,2,3,4,5,6,7,8} P_{C|Dj} P_{Dj}}{\sum_{j=1,2,5,6,9,10,13,14} P_{C|Dj} P_{Dj}}} \quad (\text{A11})$$

$$\text{cRR}_{C=0} = \frac{\frac{\sum_{j=1,2,3,4,9,10,11,12} P_{\bar{C}|DjSk} P_{DjSk}}{\sum_{j=1,2,3,4,5,6,7,8,9,10,11,12,13,14,15,16} P_{\bar{C}|DjSk} P_{DjSk}}}{\frac{\sum_{j=1,3,5,9,11,13,15} P_{\bar{C}|DjSk} P_{DjSk}}{\sum_{j=1,2,3,4,5,6,7,8,9,10,11,12,13,14,15,16} P_{\bar{C}|DjSk} P_{DjSk}} + \frac{\sum_{j=1,2,3,4,9,10,11,12} P_{\bar{C}|Dj} P_{Dj}}{\sum_{j=1,3,5,9,11,13,15} P_{\bar{C}|Dj} P_{Dj}}} \quad (\text{A12})$$

Abbreviation: cRR, causal risk ratio.

For the definitions of notations, see Figure 4.
